# Supplementary material for: Integrative transcriptomic analysis suggests new autoregulatory splicing events coupled with nonsense-mediated mRNA decay
Source: PubMed Central journal article supplement (PMC6547761; doi:10.1093/nar/gkz193), 2019-02-27
Supplement: gkz193_supplemental_file.pdf [file gkz193_supplemental_file.pdf]

Integrative transcriptomic analysis suggests new  
autoregulatory splicing events coupled with  
nonsense-mediated mRNA decay :  
SUPPLEMENTARY INFORMATION

D. Pervouchine *et al.*

February 1, 2019

**List of Figures**

|    |                                                                          |   |
|----|--------------------------------------------------------------------------|---|
| S1 | The distribution of exon $z$ -scores . . . . .                           | 2 |
| S2 | Differential exon inclusion analysis in SMG6/XRN1 co-depletion . . . . . | 3 |
| S3 | Relative positions of reactive exons . . . . .                           | 4 |
| S4 | Frequencies of essential and non-essential internal exons . . . . .      | 4 |
| S5 | Median distance to the closet cognate eCLIP peak . . . . .               | 5 |
| S6 | Reactive exons with a nearby cognate eCLIP . . . . .                     | 6 |
|    | (A) FUS . . . . .                                                        | 6 |
|    | (B) HNRNPM . . . . .                                                     | 6 |
|    | (C) U2AF2 . . . . .                                                      | 6 |
|    | (D) IGFBP2 . . . . .                                                     | 6 |
| S7 | Examples in PTBP1 and TARDBP genes . . . . .                             | 7 |
|    | (A) PTBP1 . . . . .                                                      | 7 |
|    | (B) TARDBP . . . . .                                                     | 7 |
| S8 | Reactive exons without nearby cognate eCLIP peaks . . . . .              | 8 |
|    | (A) RBM39 . . . . .                                                      | 8 |
|    | (B) SRSF3 . . . . .                                                      | 8 |
|    | (C) SRSF4 . . . . .                                                      | 8 |

**List of Tables**

|    |                                                                         |    |
|----|-------------------------------------------------------------------------|----|
| S1 | The list of accession numbers . . . . .                                 | 12 |
| S2 | GO enrichment analysis of GWN . . . . .                                 | 12 |
| S3 | The top 15 genes with the largest gene expression fold change . . . . . | 13 |
| S4 | GO enrichment analysis of NMD targets . . . . .                         | 13 |
| S5 | GO enrichment analysis of hosts of reactive exons . . . . .             | 14 |

# 1 Supplementary Figures

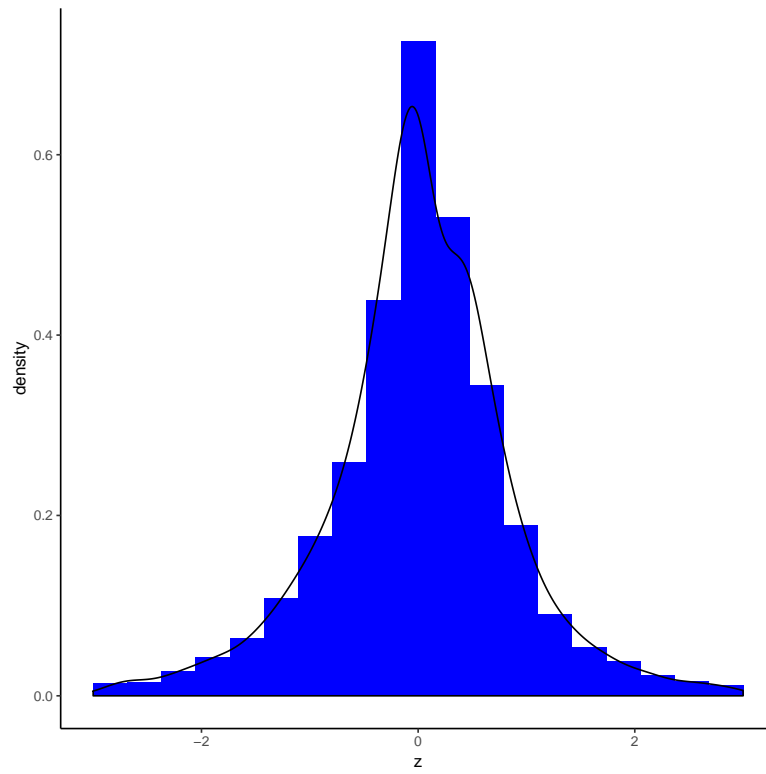

Figure S1: The distribution of exon  $z$ -scores. In each bin of  $\log_{10}$  of the mean split read count, we computed the mean and the standard deviation of  $\Delta\Psi$ , excluding exons with  $\Delta\Psi = 0$ , and assigned the corresponding  $z$ -score to each exon.

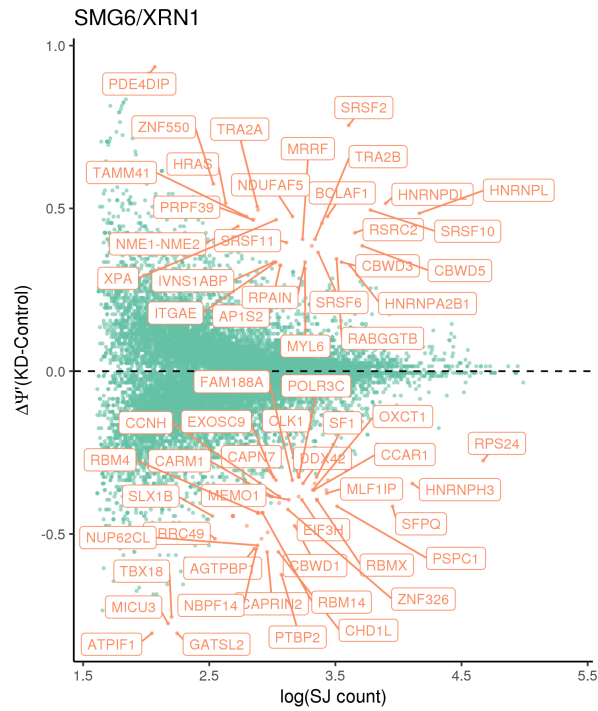

(A)

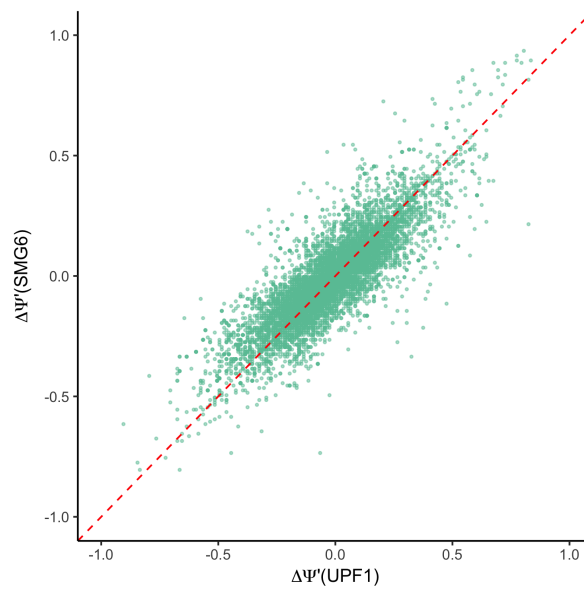

(B)

Figure S2: **(a)** Differential exon inclusion analysis in SMG6/XRN1 co-depletion. Changes at the 1% significance level are shown in orange. **(a)** The difference of exon inclusion ( $\Delta\Psi$ ) in UPF1/XRN1 co-depletion vs. SMG6/XRN1 co-depletion.

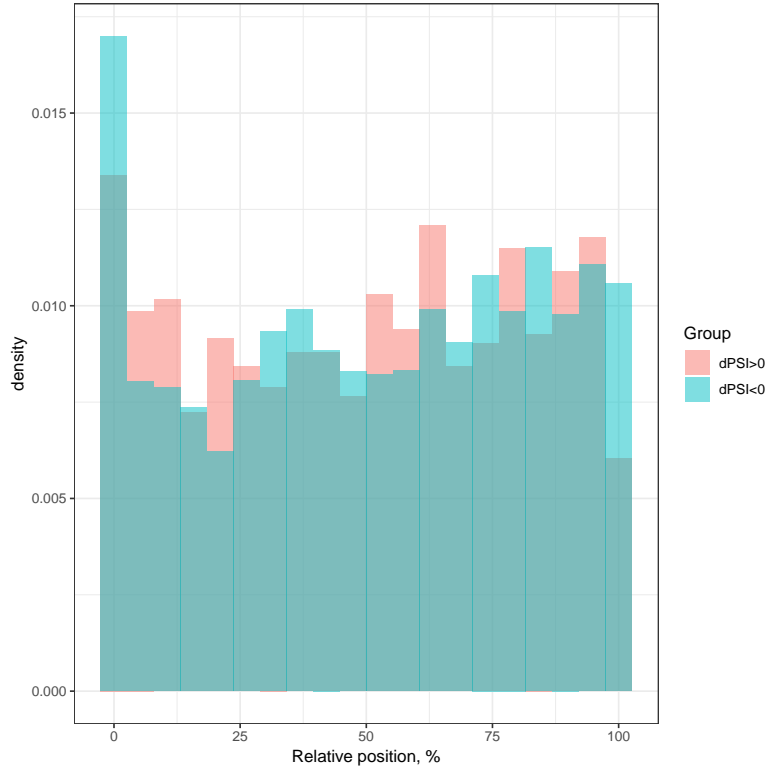

Figure S3: Relative positions within transcript of exons that are reactive to NMD inactivation.

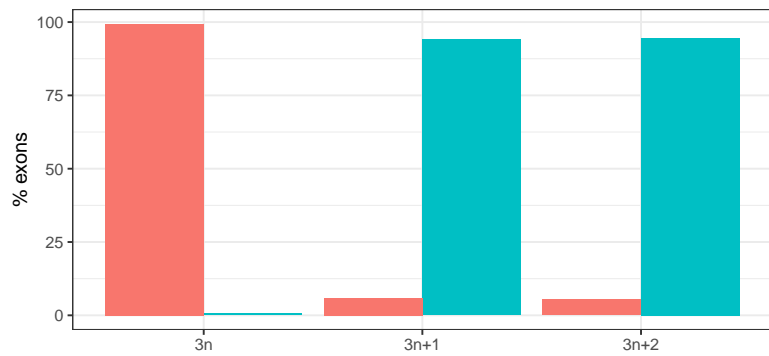

Figure S4: The percentage of essential (green) and non-essential (red) internal exons among all exons annotated in the GENCODE v19 database [1].

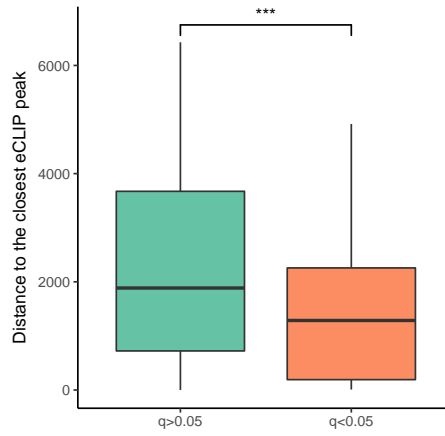

Figure S5: The median distance to the closet cognate eCLIP peak for exons that significantly change their inclusion level after NMD inactivation ( $q < 0.05$ ) and that for the other exons ( $q > 0.05$ ).

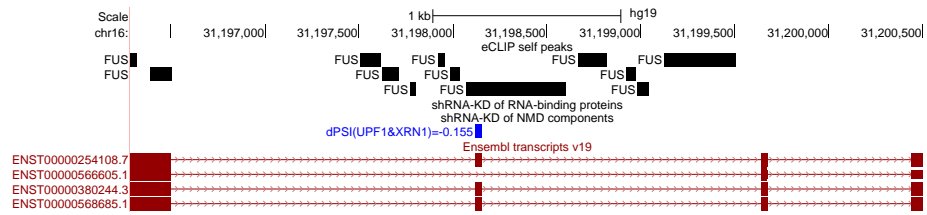

(A) FUS

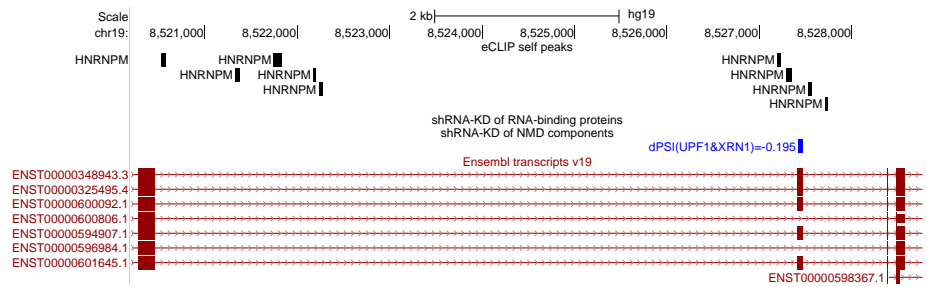

(B) HNRNPM

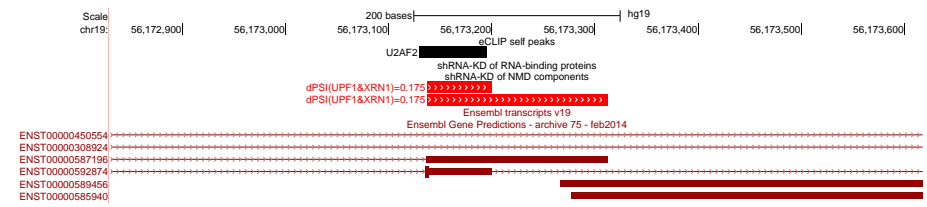

(C) U2AF2

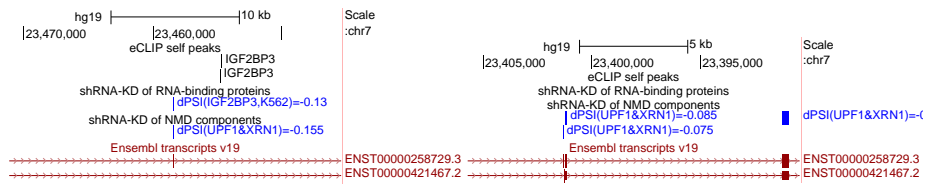

(D) IGFBP2

Figure S6: (a)-(d) Reactive exons with a nearby cognate eCLIP peak in FUS, HNRNPM, U2AF2, and IGFBP2 genes.

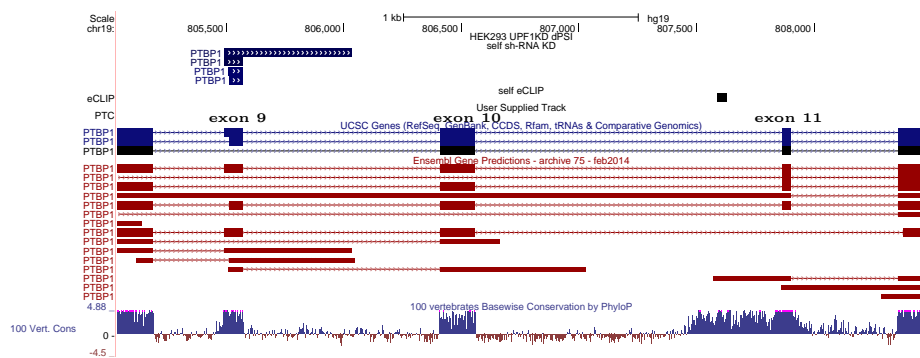

(A) PTBP1

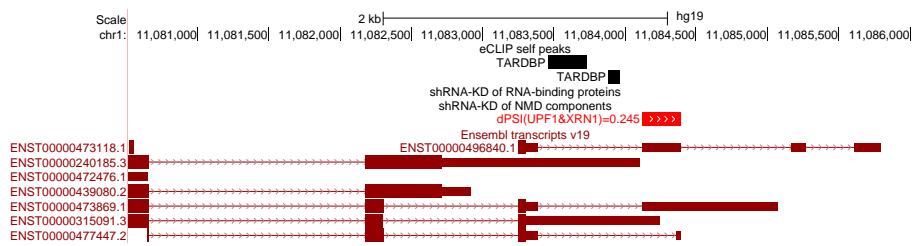

(B) TARDBP

Figure S7: (a) Essential exons in PTBP1 gene. The isoform with exon 11 skipping is not shown in Genome Browser. (b) TARDBP protein binds its 3'-UTR (binding sites are shown in black in the eCLIP track) and promotes splicing at poison exons.

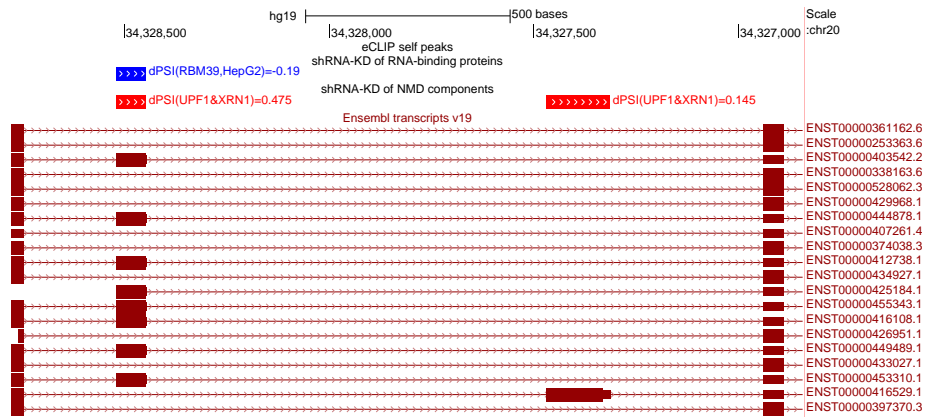

(A) RBM39

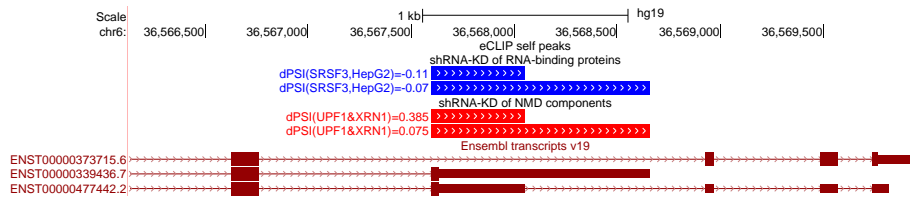

(B) SRSF3

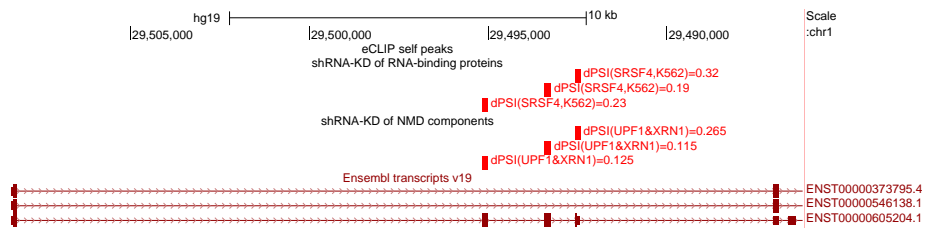

(C) SRSF4

Figure S8: (a)-(c) Reactive exons without nearby cognate eCLIP peaks in RBM39, SRSF3, and SRSF4 genes.



## 2 Supplementary Tables

| cell  | target   | PEAKS1 | PEAKS2 | KD1    | KD2    | CONT1  | CONT2  |
|-------|----------|--------|--------|--------|--------|--------|--------|
| HepG2 | AKAP1    | 807KPM | 271UXH | 446GNQ | 554EIV | 989TXQ | 558ZFO |
| HepG2 | BCCIP    | 698TRT | 627YDB | 085YWZ | 813CJQ | 572NPL | 689YCR |
| HepG2 | BCLAF1   | 691JPV | 858HBB | 878AAZ | 587FCY | 572NPL | 689YCR |
| HepG2 | BUD13    | 364QPG | 929ITC | 944UDR | 526PAV | 236XCF | 901WHO |
| HepG2 | CSTF2    | 892JUQ | 370ZBJ | 938DQM | 866AHO | 572NPL | 689YCR |
| HepG2 | CSTF2T   | 700HIR | 786JAM | 334UJK | 529NFO | 057JNE | 294SKR |
| HepG2 | DDX3X    | 798XQM | 799ICU | 572OTL | 196CGJ | 989TXQ | 558ZFO |
| HepG2 | DDX52    | 591WOA | 539JUN | 608NGH | 653INZ | 574DLW | 847SRU |
| HepG2 | DDX55    | 315AVG | 584QHX | 876ECR | 193SMU | 572NPL | 689YCR |
| HepG2 | DDX59    | 485MSN | 441KPC | 228NAK | 802SDT | 738YFT | 293RIK |
| HepG2 | DDX6     | 438KSN | 650BQD | 365JNK | 725RWM | 989TXQ | 558ZFO |
| HepG2 | DHX30    | 191HRQ | 506NPG | 751TAL | 402UGA | 784SML | 487UNM |
| HepG2 | DKC1     | 074ATJ | 043XKO | 572VRD | 454QYL | 566XUG | 486GXG |
| HepG2 | EFTUD2   | 511ZTQ | 955RUR | 039BLK | 149WKD | 574DLW | 847SRU |
| HepG2 | EIF3D    | 738CPK | 650RVF | 713UFE | 708DON | 574DLW | 847SRU |
| HepG2 | FAM120A  | 287ADK | 511SXX | 784QKI | 143FVG | 574DLW | 847SRU |
| HepG2 | FASTKD2  | 503DBN | 136QLO | 850TNI | 330THZ | 057JNE | 294SKR |
| HepG2 | FKBP4    | 993XGD | 585PKG | 982ALW | 257YRE | 572NPL | 689YCR |
| HepG2 | FTO      | 655JNU | 925SGC | 408FIB | 098ONQ | 738YFT | 293RIK |
| HepG2 | FUBP3    | 410ITK | 714TFP | 513ADH | 880UOR | 926DGG | 718LIT |
| HepG2 | G3BP1    | 934JFZ | 165JYX | 844ZHZ | 529THE | 989TXQ | 558ZFO |
| HepG2 | GRSF1    | 451GQU | 733VOV | 016WDI | 506AFF | 869IKC | 996UTY |
| HepG2 | GRWD1    | 735YNV | 689GDA | 420WYN | 181DMT | 261BLR | 966QBV |
| HepG2 | HNRNPA1  | 604WJZ | 535MAE | 350IPK | 045OGG | 784SML | 487UNM |
| HepG2 | HNRNPC   | 401SPQ | 738FJS | 181LSI | 497PPO | 784SML | 487UNM |
| HepG2 | HNRNPK   | 877KBJ | 556EBT | 899ZBQ | 433BRP | 989TXQ | 558ZFO |
| HepG2 | HNRNPL   | 581SSQ | 415HDB | 536UGZ | 869LKX | 566IXO | 394YXV |
| HepG2 | HNRNPM   | 040JSC | 542FRX | 601DUB | 240HMJ | 236XCF | 901WHO |
| HepG2 | HNRNPU   | 587FNW | 024FCB | 292RTX | 516UIQ | 784SML | 487UNM |
| HepG2 | HNRNPUL1 | 676GXG | 801KHR | 134YSM | 596UTY | 686VNL | 430GWF |
| HepG2 | IGF2BP3  | 175PMW | 858ZLX | 753NXB | 441NPW | 989TXQ | 558ZFO |
| HepG2 | ILF3     | 535COB | 460MRE | 485RWH | 073SBH | 869IKC | 996UTY |
| HepG2 | KHSRP    | 509GWT | 891IAC | 021RRG | 310LTU | 989TXQ | 558ZFO |
| HepG2 | LARP4    | 288SGB | 130RAQ | 890GSN | 760RVL | 930OYV | 934UWJ |
| HepG2 | LARP7    | 440FLF | 699ZLU | 870DWP | 787GCZ | 261BLR | 966QBV |
| HepG2 | LIN28B   | 976KYV | 381VVY | 511GIN | 446IUZ | 261BLR | 966QBV |
| HepG2 | LSM11    | 220ECM | 870HZF | 502SMN | 939XZO | 261BLR | 966QBV |
| HepG2 | MATR3    | 874BAL | 333CUY | 780SYO | 246QJB | 989TXQ | 558ZFO |
| HepG2 | NCBP2    | 047YUZ | 500HBQ | 594LYM | 083LTV | 989TXQ | 558ZFO |
| HepG2 | NIP7     | 077RVD | 527MFS | 354LYI | 774DZT | 261BLR | 966QBV |
| HepG2 | NKRF     | 864UGQ | 233SNH | 294MHK | 100KDW | 093UUE | 870WUB |
| HepG2 | NOL12    | 716SCR | 515WRY | 806ZKL | 466PAF | 566IXO | 394YXV |
| HepG2 | PCBP1    | 940CJE | 252BJN | 463AMS | 174ZQQ | 261RLR | 834TYC |
| HepG2 | PIG      | 597JSM | 603DSB | 374SOY | 585WPZ | 093UUE | 870WUB |
| HepG2 | PRPF8    | 646XFI | 156PFJ | 727IHN | 192LSC | 572NPL | 689YCR |
| HepG2 | PTBP1    | 471GJE | 154BAE | 145TKU | 855TDM | 261RLR | 834TYC |
| HepG2 | QKI      | 459ANM | 525PZA | 354FHT | 819VYL | 261RLR | 834TYC |
| HepG2 | RBFOX2   | 639MYI | 664WCU | 880HKN | 511KFD | 686VNL | 430GWF |
| HepG2 | RBM15    | 017HYK | 971BBY | 276WQL | 057WEZ | 278EWB | 376SXX |
| HepG2 | RBM22    | 990UNN | 353XWS | 030OLZ | 369NEZ | 742NXL | 340UAV |

|       |          |        |        |        |        |        |        |
|-------|----------|--------|--------|--------|--------|--------|--------|
| HepG2 | SF3A3    | 642VTG | 075FPZ | 923LZN | 677KRY | 168UDP | 321ZFN |
| HepG2 | SF3B4    | 581RVY | 363PGR | 301YOD | 784ZDW | 261RLR | 834TYC |
| HepG2 | SFPQ     | 221WOF | 919FIY | 611BJW | 402HCN | 686VNL | 430GWF |
| HepG2 | SRSF1    | 179SCM | 184TBM | 856VSZ | 942DHD | 261RLR | 834TYC |
| HepG2 | SRSF7    | 774EDY | 913UPA | 642TXU | 222WYC | 261RLR | 834TYC |
| HepG2 | SRSF9    | 409GPI | 125UVA | 754SUW | 664KDY | 261RLR | 834TYC |
| HepG2 | SSB      | 746RLH | 828WCR | 647DVY | 105XIV | 742NXL | 340UAV |
| HepG2 | SUGP2    | 699DTX | 187DUQ | 434QDG | 622PET | 093UUE | 870WUB |
| HepG2 | SUPV3L1  | 882KLS | 089NRQ | 082CNV | 734OAK | 572NPL | 689YCR |
| HepG2 | TAF15    | 603JTU | 063BTH | 777VEO | 531USK | 261RLR | 834TYC |
| HepG2 | TBRG4    | 472CCD | 454ZHL | 328RQK | 496DOM | 093UUE | 870WUB |
| HepG2 | TIA1     | 055IIM | 358SGV | 298LYN | 243YSW | 261RLR | 834TYC |
| HepG2 | TIAL1    | 456DAU | 473IIG | 593CFB | 273JPU | 784SML | 487UNM |
| HepG2 | TROVE2   | 515SVK | 029CYV | 119ZCG | 115CEE | 574DLW | 847SRU |
| HepG2 | U2AF1    | 295GHA | 078SCZ | 163IXV | 172LGC | 236XCF | 901WHO |
| HepG2 | U2AF2    | 444TCK | 523JWI | 911EJE | 821FZB | 686VNL | 430GWF |
| HepG2 | UCHL5    | 305LRB | 171KTG | 432SEN | 300CDS | 572NPL | 689YCR |
| HepG2 | UPF1     | 483STL | 848JHB | 850ORL | 819BTX | 168UDP | 321ZFN |
| HepG2 | UTP18    | 227SZN | 235ASG | 977IXL | 202TGW | 168UDP | 321ZFN |
| HepG2 | XPO5     | 756YND | 028MVM | 386NUM | 234HPE | 869IKC | 996UTY |
| HepG2 | XRN2     | 944KMN | 845EBP | 450HWR | 789QEA | 572NPL | 689YCR |
| HepG2 | YBX3     | 904UKX | 268SII | 296FTT | 036XRE | 784SML | 487UNM |
| K562  | AARS     | 400HPZ | 374VRV | 893IIY | 447ZJC | 310XPL | 301VBU |
| K562  | AATF     | 715LDJ | 415HBM | 492MMG | 127LYW | 662KLY | 356UJZ |
| K562  | ABCF1    | 332BZR | 376NBT | 642YMU | 494AFA | 109UAW | 827AVO |
| K562  | AGGF1    | 450VBG | 683KLO | 548MMW | 654OXL | 221UUT | 713YLH |
| K562  | AKAP1    | 701BNI | 972INE | 527DFW | 825OSD | 451VCI | 957JFM |
| K562  | AKAP8L   | 189LGT | 781FPH | 321WXT | 017QOH | 221UUT | 713YLH |
| K562  | APOBEC3C | 519AJS | 319VBB | 775RQD | 544QYX | 345DRD | 171TGT |
| K562  | AQR      | 325SFV | 465QKS | 392SMI | 465UCM | 971OQY | 824KJT |
| K562  | BUD13    | 102QYZ | 560OAU | 972TOM | 559DCV | 109UAW | 827AVO |
| K562  | CPEB4    | 379DBY | 104VMP | 960MRQ | 360MMY | 840VCF | 306VXJ |
| K562  | CPSF6    | 284QIO | 515QAG | 112VHC | 885HMK | 907AVE | 006QUW |
| K562  | CSTF2T   | 043QXI | 379UQU | 234KME | 268PZN | 662KLY | 356UJZ |
| K562  | DDX21    | 945XNS | 572GMO | 576IXB | 964BVO | 250NQT | 072REC |
| K562  | DDX24    | 006KFT | 354NUG | 661TWW | 325OHE | 451VCI | 957JFM |
| K562  | DDX3X    | 039BKT | 737SOJ | 303ZST | 109RMW | 451VCI | 957JFM |
| K562  | DDX51    | 475ZZT | 042FAB | 265DPE | 197WZP | 360OFU | 269IZJ |
| K562  | DDX52    | 343EUG | 818KZJ | 817BSA | 935IWT | 360OFU | 269IZJ |
| K562  | DDX55    | 432FVJ | 099PFC | 872MZO | 109SXS | 310XPL | 301VBU |
| K562  | DDX6     | 626UUD | 906PBB | 514XUK | 997AWJ | 451VCI | 957JFM |
| K562  | DHX30    | 507AKH | 634UAJ | 424VAD | 867IZU | 678FMA | 965KEL |
| K562  | DROSHA   | 602ZLI | 840QVA | 362VKF | 382SWC | 721YDQ | 471LQQ |
| K562  | EFTUD2   | 689YIJ | 691BHS | 758WPH | 993VQJ | 360OFU | 269IZJ |
| K562  | EIF3G    | 362BDI | 258VPL | 970NBJ | 837MHH | 951AKS | 058RBW |
| K562  | EIF4G2   | 462XFB | 512MNG | 960NRI | 077BDV | 345DRD | 171TGT |
| K562  | EWSR1    | 535SBV | 621ZUN | 154NAH | 589TXX | 451VCI | 957JFM |
| K562  | FAM120A  | 150KMB | 901AAL | 644NDS | 132LJM | 360OFU | 269IZJ |
| K562  | FASTKD2  | 885BWV | 943JBN | 781YOL | 072TOC | 951AKS | 058RBW |
| K562  | FMR1     | 965SEZ | 393YLO | 120YNR | 365TMN | 907AVE | 006QUW |
| K562  | FTO      | 465VTS | 485IYX | 139JVG | 620KGA | 907AVE | 006QUW |
| K562  | FUS      | 446LST | 764SZR | 829EPJ | 436IYL | 951AKS | 058RBW |
| K562  | FXR1     | 678MSG | 464GTB | 149PGZ | 923OMI | 451VCI | 957JFM |
| K562  | FXR2     | 871ZJM | 639OOE | 678VOG | 293OGK | 451VCI | 957JFM |

|      |          |        |        |        |        |        |        |
|------|----------|--------|--------|--------|--------|--------|--------|
| K562 | GEMIN5   | 594WHT | 083ZYT | 633KQS | 946XFO | 360OFU | 269IZJ |
| K562 | GPKOW    | 760JZI | 410KNT | 454PAB | 834RZF | 907AVE | 006QUW |
| K562 | GRWD1    | 607PIM | 757KMM | 174EQN | 074WVB | 310XPL | 301VBU |
| K562 | GTF2F1   | 739CHZ | 968DUU | 388MKH | 204XOP | 662KLY | 356UJZ |
| K562 | HLTF     | 726GRF | 952TOI | 488HTU | 594VBS | 662KLY | 356UJZ |
| K562 | HNRNPA1  | 615KJU | 174RLY | 398HLD | 979PHM | 094PAZ | 699LOO |
| K562 | HNRNPC   | 062LWZ | 971ZDB | 614AMY | 476PZV | 310XPL | 301VBU |
| K562 | HNRNPK   | 079MYZ | 769QNG | 808LWD | 519LDN | 250NQT | 072REC |
| K562 | HNRNPL   | 796KSB | 782DAY | 638CZN | 621OWD | 840VCF | 306VXJ |
| K562 | HNRNPM   | 016LSY | 462KTW | 353DLI | 380WYR | 109UAW | 827AVO |
| K562 | HNRNPU   | 014BXV | 960NDY | 799PKF | 616IYG | 094PAZ | 699LOO |
| K562 | HNRNPUL1 | 734NGD | 297PQZ | 650THJ | 032BIU | 721YDQ | 471LQQ |
| K562 | IGF2BP1  | 435MEM | 701YCW | 275QEO | 597IYH | 250NQT | 072REC |
| K562 | IGF2BP2  | 968WTB | 512QJT | 377DNM | 739FOM | 250NQT | 072REC |
| K562 | ILF3     | 857MJR | 821QFO | 176YUC | 605MVJ | 678FMA | 965KEL |
| K562 | KHDRBS1  | 390ANM | 052ABQ | 703FOH | 414ANM | 678FMA | 965KEL |
| K562 | KHSRP    | 498QZQ | 531NDZ | 907ZKI | 795LDC | 250NQT | 072REC |
| K562 | LARP4    | 305LNT | 544HGJ | 586UQY | 393WYS | 721YDQ | 471LQQ |
| K562 | LARP7    | 017NRG | 208AAW | 330TDS | 616HGG | 310XPL | 301VBU |
| K562 | LIN28B   | 823WIW | 823UGV | 385ZPU | 505JCB | 310XPL | 301VBU |
| K562 | LSM11    | 425PPQ | 136HXF | 200DJS | 217NHJ | 310XPL | 301VBU |
| K562 | MATR3    | 121ZEY | 904GOE | 947WJB | 547XWI | 250NQT | 072REC |
| K562 | METAP2   | 727RJA | 041HMB | 426HXK | 532SHV | 907AVE | 006QUW |
| K562 | MTPAP    | 984DXU | 448TUI | 504BUN | 287RFQ | 055IEE | 823LBA |
| K562 | NCBP2    | 509XPD | 014NHI | 342FMY | 982FDC | 451VCI | 957JFM |
| K562 | NONO     | 174MVU | 201YQC | 802XVR | 687USH | 360OFU | 269IZJ |
| K562 | NPM1     | 743GIA | 392QAQ | 838WJE | 986JGI | 721YDQ | 471LQQ |
| K562 | NSUN2    | 270MTA | 257SMG | 206WPX | 678LZA | 055IEE | 823LBA |
| K562 | PABPC4   | 463ZSJ | 772SPP | 979EOV | 206ASM | 812XUV | 201SIR |
| K562 | PCBP1    | 022GSN | 381ZBA | 644HYW | 227XAW | 250NQT | 072REC |
| K562 | PHF6     | 016IHL | 967JAT | 138JQO | 340ZEG | 310XPL | 301VBU |
| K562 | PPIL4    | 036ZXE | 188XKC | 085VCF | 805KGC | 689TGX | 486RUF |
| K562 | PRPF8    | 576DYQ | 687LRO | 096IJH | 660WGY | 360OFU | 269IZJ |
| K562 | PTBP1    | 262NXW | 200AWX | 813ICC | 936ZPB | 250NQT | 072REC |
| K562 | PUM1     | 933SBL | 060XYT | 463YXB | 553SKC | 345DRD | 171TGT |
| K562 | PUM2     | 091HXE | 262JRE | 735KTG | 654RKB | 345DRD | 171TGT |
| K562 | PUS1     | 990JXJ | 268XIE | 775UPA | 722UNY | 221UUT | 713YLH |
| K562 | QKI      | 534JXG | 963AMI | 124CQK | 226JJS | 812XUV | 201SIR |
| K562 | RBFOX2   | 076RDA | 994PFX | 146CHN | 920LNP | 678FMA | 965KEL |
| K562 | RBM15    | 715SCF | 404OSK | 430ISK | 355EHE | 221UUT | 713YLH |
| K562 | RBM22    | 074GNZ | 020UVE | 856EUQ | 210USC | 250NQT | 072REC |
| K562 | RPS3     | 323ZDL | 922WMS | 580UQE | 664HRD | 951AKS | 058RBW |
| K562 | SAFB2    | 273BVZ | 801ARQ | 605NAW | 198QMX | 192WNC | 546CWI |
| K562 | SBDS     | 873TSY | 175EIG | 964ACB | 055WUU | 689TGX | 486RUF |
| K562 | SERBP1   | 979XAE | 710IZS | 579KTN | 145RMT | 360OFU | 269IZJ |
| K562 | SF3B1    | 498GFT | 210VRR | 888GPL | 299OPQ | 907AVE | 006QUW |
| K562 | SF3B4    | 013ZHF | 658CBT | 454UXB | 730MBP | 812XUV | 201SIR |
| K562 | SLBP     | 397VAA | 874WRG | 741VFO | 579RKL | 678FMA | 965KEL |
| K562 | SLTM     | 052VSB | 392CBU | 738RJJ | 551BGC | 951AKS | 058RBW |
| K562 | SMNDC1   | 581FUT | 142PZD | 755KEU | 152IUL | 662KLY | 356UJZ |
| K562 | SND1     | 479VZE | 677MQI | 521QBU | 868JUI | 951AKS | 058RBW |
| K562 | SRSF1    | 609IXO | 287KWV | 451ILH | 446IVL | 250NQT | 072REC |
| K562 | SRSF7    | 090BZK | 939AMV | 495CHO | 871XKQ | 250NQT | 072REC |
| K562 | SSB      | 704NUD | 871PJK | 150PMH | 629VLO | 951AKS | 058RBW |

|      |         |        |        |        |        |        |        |
|------|---------|--------|--------|--------|--------|--------|--------|
| K562 | SUPV3L1 | 207VRH | 942LSK | 710LUV | 654PVK | 360OFU | 269IZJ |
| K562 | TAF15   | 979IVI | 783IGF | 669KZU | 862NET | 812XUV | 201SIR |
| K562 | TARDBP  | 697CMV | 333KPU | 782EXB | 202XMY | 250NQT | 072REC |
| K562 | TBRG4   | 033ZLA | 040CEA | 374VZI | 341NGU | 812XUV | 201SIR |
| K562 | TIA1    | 509PKA | 673MNH | 622BGG | 675IKK | 250NQT | 072REC |
| K562 | TRA2A   | 257VRQ | 744EQP | 120IKS | 995OUG | 250NQT | 072REC |
| K562 | TROVE2  | 243GNO | 043TCO | 857CHR | 659AIM | 892EVK | 680FLW |
| K562 | U2AF1   | 555DWV | 468LUS | 352HEO | 049WEE | 812XUV | 201SIR |
| K562 | U2AF2   | 430RTZ | 454FEB | 942VXX | 676CZA | 812XUV | 201SIR |
| K562 | UCHL5   | 713NFZ | 912GTJ | 922PAN | 658NSQ | 360OFU | 269IZJ |
| K562 | UPF1    | 873FZT | 792HYY | 243KYH | 632FEO | 055IEE | 823LBA |
| K562 | UTP18   | 379LHC | 014AWF | 191GKG | 609RPE | 221UUT | 713YLH |
| K562 | WDR3    | 991NPH | 380SYQ | 668TYJ | 450FFU | 055IEE | 823LBA |
| K562 | WDR43   | 425HAU | 509FAF | 799ITP | 605UTR | 055IEE | 823LBA |
| K562 | WRN     | 138IUK | 109LYL | 406QFV | 354ESP | 971OQY | 824KJT |
| K562 | XRCC6   | 564IUM | 007DHU | 175FUM | 180LMY | 662KLY | 356UJZ |
| K562 | XRN2    | 441GJR | 167DBG | 950IVB | 092ZPJ | 360OFU | 269IZJ |
| K562 | YBX3    | 526YVR | 231IID | 048SVW | 507VIL | 678FMA | 965KEL |
| K562 | ZC3H8   | 515ATI | 990BSZ | 098NLK | 635XIV | 971OQY | 824KJT |
| K562 | ZRANB2  | 464HWD | 709ENB | 586GDJ | 031QIE | 662KLY | 356UJZ |

Table S1: The list of RNA-binding proteins, eCLIP (PEAK1 and PEAK2), shRNA-KD followed RNA-seq experiment (KD1, KD2) and their control experiments (CONTROL1, CONTROL2) accession numbers [2, 3]. The "ENCFF" prefix in accession has been omitted.

Table S2: GO enrichment analysis (Biological Process) of Genes with at least one NMD transcript (GWN) using GOrilla [4].

| GO Term    | Description                                | p-value  | FDR q-value |
|------------|--------------------------------------------|----------|-------------|
| GO:0003824 | catalytic activity                         | 1.04E-39 | 4.27E-36    |
| GO:0036094 | small molecule binding                     | 3.91E-23 | 8.01E-20    |
| GO:1901265 | nucleoside phosphate binding               | 9.60E-23 | 1.31E-19    |
| GO:0000166 | nucleotide binding                         | 1.29E-22 | 1.32E-19    |
| GO:0005524 | ATP binding                                | 3.56E-16 | 2.92E-13    |
| GO:0005488 | binding                                    | 1.22E-15 | 8.34E-13    |
| GO:0035639 | purine ribonucleoside triphosphate binding | 1.50E-15 | 8.81E-13    |
| GO:0003723 | RNA binding                                | 1.59E-15 | 8.15E-13    |
| GO:0030554 | adenyl nucleotide binding                  | 1.90E-15 | 8.67E-13    |
| GO:0032559 | adenyl ribonucleotide binding              | 2.00E-15 | 8.21E-13    |
| GO:0032549 | ribonucleoside binding                     | 3.31E-15 | 1.24E-12    |
| GO:0001883 | purine nucleoside binding                  | 3.69E-15 | 1.26E-12    |
| GO:0032550 | purine ribonucleoside binding              | 4.11E-15 | 1.30E-12    |
| GO:0001882 | nucleoside binding                         | 5.01E-15 | 1.47E-12    |
| GO:0005515 | protein binding                            | 6.46E-15 | 1.77E-12    |

Table S3: The top 15 genes with the largest gene expression fold change between UPF1/XRN1 co-depletion and control.

| ID             | baseMean | log2FoldChange | p-value | Gene    |
|----------------|----------|----------------|---------|---------|
| TCONS_00166954 | 5365.64  | 2.562          | 0.01388 | BRD2    |
| TCONS_00034807 | 18856.60 | 2.539          | 0.01384 | SNHG1   |
| TCONS_00176132 | 8304.77  | 2.534          | 0.01429 | CCT6P3  |
| TCONS_00176130 | 3356.49  | 2.525          | 0.01538 | CCT6P3  |
| TCONS_00001342 | 7025.46  | 2.505          | 0.01522 | SRRM1   |
| TCONS_00070942 | 3337.18  | 2.505          | 0.01596 | 61E3.4  |
| TCONS_00159029 | 3264.56  | 2.498          | 0.01620 | MATR3   |
| TCONS_00070925 | 2505.97  | 2.493          | 0.01679 | SMG1P1  |
| TCONS_00019843 | 2258.43  | 2.492          | 0.01721 | AGAP6   |
| TCONS_00163703 | 2612.10  | 2.484          | 0.01699 | FAM13B  |
| TCONS_00101194 | 4421.11  | 2.478          | 0.01646 | SAE1    |
| TCONS_00182764 | 2072.64  | 2.478          | 0.01765 | DNAJC2  |
| TCONS_00127428 | 9299.07  | 2.478          | 0.01589 | RBM39   |
| TCONS_00010353 | 2930.28  | 2.477          | 0.01796 | CROCCP2 |
| TCONS_00198400 | 2045.45  | 2.477          | 0.01773 | FBXW2   |

Table S4: GO enrichment analysis (Biological Process) of the 200 genes with the largest fold change between UPF1/XRN1 co-depletion and control. Top 10 GO terms with P-value <  $10^{-3}$  are shown.

| GOBPID     | ExpCount | Count | Size | Term                                                                                 |
|------------|----------|-------|------|--------------------------------------------------------------------------------------|
| GO:0006396 | 7        | 37    | 936  | RNA processing                                                                       |
| GO:0006397 | 3        | 27    | 491  | mRNA processing                                                                      |
| GO:0008380 | 3        | 23    | 428  | RNA splicing                                                                         |
| GO:0016071 | 6        | 30    | 812  | mRNA metabolic process                                                               |
| GO:0000377 | 2        | 19    | 323  | RNA splicing, via transesterification reactions with bulged adenosine as nucleophile |
| GO:0000398 | 2        | 19    | 323  | mRNA splicing, via spliceosome                                                       |
| GO:0000375 | 2        | 19    | 326  | RNA splicing, via transesterification reactions                                      |
| GO:0090304 | 37       | 65    | 5206 | nucleic acid metabolic process                                                       |
| GO:0050684 | 1        | 9     | 112  | regulation of mRNA processing                                                        |
| GO:0043484 | 0        | 6     | 118  | regulation of RNA splicing                                                           |

Table S5: GO enrichment analysis (Biological Process) of the genes hosting differentially spliced exons (adjusted p-value < 0.05) in UPF1/XRN1 co-depletion and control. The top 15 GO terms with P-value <  $10^{-3}$  are shown.

| GOBPID     | OddsRatio | ExpCount | Count | Size | Term                                                                                 |
|------------|-----------|----------|-------|------|--------------------------------------------------------------------------------------|
| GO:0043484 | 30.773    | 0        | 6     | 118  | regulation of RNA splicing                                                           |
| GO:0033119 | 103.119   | 0        | 4     | 25   | negative regulation of RNA splicing                                                  |
| GO:0006396 | 8.886     | 2        | 12    | 936  | RNA processing                                                                       |
| GO:0000377 | 15.447    | 1        | 8     | 323  | RNA splicing, via transesterification reactions with bulged adenosine as nucleophile |
| GO:0000398 | 15.447    | 1        | 8     | 323  | mRNA splicing, via spliceosome                                                       |
| GO:0000375 | 15.298    | 1        | 8     | 326  | RNA splicing, via transesterification reactions                                      |
| GO:0048024 | 38.162    | 0        | 5     | 78   | regulation of mRNA splicing, via spliceosome                                         |
| GO:0008380 | 11.514    | 1        | 8     | 428  | RNA splicing                                                                         |
| GO:0050684 | 25.984    | 0        | 5     | 112  | regulation of mRNA processing                                                        |
| GO:0016071 | 7.934     | 2        | 10    | 812  | mRNA metabolic process                                                               |
| GO:0006397 | 9.975     | 1        | 8     | 491  | mRNA processing                                                                      |
| GO:0048025 | 92.663    | 0        | 3     | 20   | negative regulation of mRNA splicing, via spliceosome                                |
| GO:0050686 | 58.310    | 0        | 3     | 30   | negative regulation of mRNA processing                                               |
| GO:0006406 | 20.329    | 0        | 4     | 110  | mRNA export from nucleus                                                             |
| GO:0071427 | 20.329    | 0        | 4     | 110  | mRNA-containing ribonucleoprotein complex export from nucleus                        |

**SupplementaryDataFie 1:** SupplementaryDataFile1.tsv

**SupplementaryDataFie 2:** SupplementaryDataFile2.tsv

**SupplementaryDataFie 3:** SupplementaryDataFile3.tsv

## Supplementary References

- [1] Church, D. M., Schneider, V. A., Graves, T., Auger, K., Cunningham, F., Bouk, N., Chen, H. C., Agarwala, R., McLaren, W. M., Ritchie, G. R., Albracht, D., Kremitzki, M., Rock, S., Kotkiewicz, H., Kremitzki, C., Wollam, A., Trani, L., Fulton, L., Fulton, R., Matthews, L., Whitehead, S., Chow, W., Torrance, J., Dunn, M., Harden, G., Threadgold, G., Wood, J., Collins, J., Heath, P., Griffiths, G., Pelan, S., Grafham, D., Eichler, E. E., Weinstock, G., Mardis, E. R., Wilson, R. K., Howe, K., Flicek, P., and Hubbard, T. (Jul, 2011) Modernizing reference genome assemblies. *PLoS Biol.*, **9**(7), e1001091.
- [2] Dunham, I., Kundaje, A., Aldred, S. F., Collins, P. J., Davis, C. A., Doyle, F., Epstein, C. B., Frietze, S., Harrow, J., Kaul, R., Khatun, J., Lajoie, B. R., Landt, S. G., Lee, B. K., Pauli, F., Rosenbloom, K. R., Sabo, P., Safi, A., Sanyal, A., Shores, N., Simon, J. M., Song, L., Trinklein, N. D., Altshuler, R. C., Birney, E., Brown, J. B., Cheng, C., Djebali, S., Dong, X., Dunham, I., Ernst, J., Furey, T. S., Gerstein, M., Giardine, B., Greven, M., Hardison, R. C., Harris, R. S., Herrero, J., Hoffman, M. M., Iyer, S., Kellis, M., Khatun, J., Kheradpour, P., Kundaje, A., Lassmann, T., Li, Q., Lin, X., Marinov, G. K., Merkel, A., Mortazavi, A., Parker, S. C., Reddy, T. E., Rozowsky, J., Schlesinger, F., Thurman, R. E., Wang, J., Ward, L. D., Whitfield, T. W., Wilder, S. P., Wu, W., Xi, H. S., Yip, K. Y., Zhuang, J., Pazin, M. J., Lowdon, R. F., Dillon, L. A., Adams, L. B., Kelly, C. J., Zhang, J., Wexler, J. R., Green, E. D., Good, P. J., Feingold, E. A., Bernstein, B. E., Birney, E., Crawford, G. E., Dekker, J., Elnitski, L., Farnham, P. J., Gerstein, M., Giddings, M. C., Gingeras, T. R., Green, E. D., Guigo, R., Hardison, R. C., Hubbard, T. J., Kellis, M., Kent, W., Lieb, J. D., Margulies, E. H., Myers, R. M., Snyder, M., Stamatoyannopoulos, J. A., Tenenbaum, S. A., Weng, Z., White, K. P., Wold, B., Khatun, J., Yu, Y., Wrobel, J., Risk, B. A., Gunawardena, H. P., Kuiper, H. C., Maier, C. W., Xie, L., Chen, X., Giddings, M. C., Bernstein, B. E., Epstein, C. B., Shores, N., Ernst, J., Kheradpour, P., Mikkelsen, T. S., Gillespie, S., Goren, A., Ram, O., Zhang, X., Wang, L., Issner, R., Coyne, M. J., Durham, T., Ku, M., Truong, T., Ward, L. D., Altshuler, R. C., Eaton, M. L., Kellis, M., Djebali, S., Davis, C. A., Merkel, A., Dobin, A., Lassmann, T., Mortazavi, A., Tanzer, A., Lagarde, J., Lin, W., Schlesinger, F., Xue, C., Marinov, G. K., Khatun, J., Williams, B. A., Zaleski, C., Rozowsky, J., Roder, M., Kokocinski, F., Abdelhamid, R. F., Alioto, T., Antoshechkin, I., Baer, M. T., Batut, P., Bell, I., Bell, K., Chakraborty, S., Chen, X., Chrast, J., Curado, J., Derrien, T., Drenkow, J., Dumais, E., Dumais, J., Dutttagupta, R., Fastuca, M., Fejes-Toth, K., Ferreira, P., Foissac, S., Fullwood, M. J., Gao, H., Gonzalez, D., Gordon, A., Gunawardena, H. P., Howald, C., Jha, S., Johnson, R., Kapranov, P., King, B., Kingswood, C., Li, G., Luo, O. J., Park, E., Preall, J. B., Presaud, K., Ribeca, P., Risk, B. A., Robyr, D., Ruan, X., Sammeth, M., Sandhu, K. S., Schaeffer, L., See, L. H., Shahab, A., Skancke, J., Suzuki, A. M., Takahashi, H., Tilgner, H., Trout, D., Walters, N., Wang, H., Wrobel, J., Yu, Y., Hayashizaki, Y., Harrow, J., Gerstein, M., Hubbard, T. J., Reymond, A., Antonarakis, S. E., Hannon, G. J., Giddings, M. C., Ruan, Y., Wold, B., Carninci, P., Guigo, R., Gingeras, T. R., Rosenbloom,



K. R., Sloan, C. A., Learned, K., Malladi, V. S., Wong, M. C., Barber, G. P., Cline, M. S., Dreszer, T. R., Heitner, S. G., Karolchik, D., Kent, W., Kirkup, V. M., Meyer, L. R., Long, J. C., Maddren, M., Raney, B. J., Furey, T. S., Song, L., Gräfeder, L. L., Giresi, P. G., Lee, B. K., Battenhouse, A., Sheffield, N. C., Simon, J. M., Showers, K. A., Safi, A., London, D., Bhinge, A. A., Shestak, C., Schaner, M. R., Kim, S. K., Zhang, Z. Z., Mieczkowski, P. A., Mieczkowska, J. O., Liu, Z., McDaniell, R. M., Ni, Y., Rashid, N. U., Kim, M. J., Adar, S., Zhang, Z., Wang, T., Winter, D., Keefe, D., Birney, E., Iyer, V. R., Lieb, J. D., Crawford, G. E., Li, G., Sandhu, K. S., Zheng, M., Wang, P., Luo, O. J., Shahab, A., Fullwood, M. J., Ruan, X., Ruan, Y., Myers, R. M., Pauli, F., Williams, B. A., Gertz, J., Marinov, G. K., Reddy, T. E., Vielmetter, J., Partridge, E., Trout, D., Varley, K. E., Gasper, C., Bansal, A., Pepke, S., Jain, P., Amrhein, H., Bowling, K. M., Anaya, M., Cross, M. K., King, B., Muratet, M. A., Antoshechkin, I., Newberry, K. M., McCue, K., Nesmith, A. S., Fisher-Aylor, K. I., Pusey, B., DeSalvo, G., Parker, S. L., Balasubramanian, S., Davis, N. S., Meadows, S. K., Eggleston, T., Gunter, C., Newberry, J., Levy, S. E., Absher, D. M., Mortazavi, A., Wong, W. H., Wold, B., Blow, M. J., Visel, A., Pennachio, L. A., Elnitski, L., Margulies, E. H., Parker, S. C., Petrykowska, H. M., Abyzov, A., Aken, B., Barrell, D., Barson, G., Berry, A., Bignell, A., Boychenko, V., Bussotti, G., Chrast, J., Davidson, C., Derrien, T., Despacio-Reyes, G., Diekhans, M., Ezkurdia, I., Frankish, A., Gilbert, J., Gonzalez, J. M., Griffiths, E., Harte, R., Hendrix, D. A., Howald, C., Hunt, T., Jungreis, I., Kay, M., Khurana, E., Kokocinski, F., Leng, J., Lin, M. F., Loveland, J., Lu, Z., Manthravadi, D., Mariotti, M., Mudge, J., Mukherjee, G., Notredame, C., Pei, B., Rodriguez, J. M., Saunders, G., Sboner, A., Searle, S., Sisu, C., Snow, C., Steward, C., Tanzer, A., Tapanari, E., Tress, M. L., van Baren, M. J., Walters, N., Washietl, S., Wilming, L., Zadissa, A., Zhang, Z., Brent, M., Haussler, D., Kellis, M., Valencia, A., Gerstein, M., Reymond, A., Guigo, R., Harrow, J., Hubbard, T. J., Landt, S. G., Fietze, S., Abyzov, A., Addleman, N., Alexander, R. P., Auerbach, R. K., Balasubramanian, S., Bettinger, K., Bhardwaj, N., Boyle, A. P., Cao, A. R., Cayting, P., Charos, A., Cheng, Y., Cheng, C., Eastman, C., Euskirchen, G., Fleming, J. D., Grubert, F., Habegger, L., Hariharan, M., Harmanci, A., Iyengar, S., Jin, V. X., Karczewski, K. J., Kasowski, M., Lacroute, P., Lam, H., Lamarre-Vincent, N., Leng, J., Lian, J., Lindahl-AlLEN, M., Min, R., Miotto, B., Monahan, H., Moqtaderi, Z., Mu, X. J., O'Geen, H., Ouyang, Z., Patacsil, D., Pei, B., Raha, D., Ramirez, L., Reed, B., Rozowsky, J., Sboner, A., Shi, M., Sisu, C., Slifer, T., Witt, H., Wu, L., Xu, X., Yan, K. K., Yang, X., Yip, K. Y., Zhang, Z., Struhl, K., Weissman, S. M., Gerstein, M., Farnham, P. J., Snyder, M., Tenenbaum, S. A., Penalva, L. O., Doyle, F., Karmakar, S., Landt, S. G., Bhanvadia, R. R., Choudhury, A., Domanus, M., Ma, L., Moran, J., Patacsil, D., Slifer, T., Victorsen, A., Yang, X., Snyder, M., Auer, T., Centanin, L., Eichenlaub, M., Gruhl, F., Heermann, S., Hoeckendorf, B., Inoue, D., Kellner, T., Kirchmaier, S., Mueller, C., Reinhardt, R., Schertel, L., Schneider, S., Sinn, R., Wittbrodt, B., Wittbrodt, J., Weng, Z., Whitfield, T. W., Wang, J., Collins, P. J., Aldred, S. F., Trinklein, N. D., Partridge, E. C., Myers, R. M., Dekker, J., Jain, G., Lajoie, B. R., Sanyal, A., Balasundaram, G., Bates, D. L., Byron, R., Canfield, T. K., Diegel, M. J., Dunn, D., Ebersol, A. K., Frum, T., Garg, K., Gist, E., Hansen, R., Boatman, L., Haugen, E., Humbert, R., Jain,

- G., Johnson, A. K., Johnson, E. M., Kutuyavin, T. V., Lajoie, B. R., Lee, K., Lotakis, D., Maurano, M. T., Neph, S. J., Neri, F. V., Nguyen, E. D., Qu, H., Reynolds, A. P., Roach, V., Rynes, E., Sabo, P., Sanchez, M. E., Sandstrom, R. S., Sanyal, A., Shafer, A. O., Stergachis, A. B., Thomas, S., Thurman, R. E., Vernot, B., Vierstra, J., Vong, S., Wang, H., Weaver, M. A., Yan, Y., Zhang, M., Akey, J. M., Bender, M., Dorschner, M. O., Groudine, M., MacCoss, M. J., Navas, P., Stamatoyannopoulos, G., Kaul, R., Dekker, J., Stamatoyannopoulos, J. A., Dunham, I., Beal, K., Brazma, A., Flicek, P., Herrero, J., Johnson, N., Keefe, D., Lusk, M., Luscombe, N. M., Sobral, D., Vaquerizas, J. M., Wilder, S. P., Batzoglou, S., Sidow, A., Hussami, N., Kyriazopoulou-Panagiotopoulou, S., Libbrecht, M. W., Schaub, M. A., Kundaje, A., Hardison, R. C., Miller, W., Giardine, B., Harris, R. S., Wu, W., Bickel, P. J., Banfai, B., Boley, N. P., Brown, J. B., Huang, H., Li, Q., Li, J. J., Noble, W. S., Bilmes, J. A., Buske, O. J., Hoffman, M. M., Sahu, A. D., Kharchenko, P. V., Park, P. J., Baker, D., Taylor, J., Weng, Z., Iyer, S., Dong, X., Greven, M., Lin, X., Wang, J., Xi, H. S., Zhuang, J., Gerstein, M., Alexander, R. P., Balasubramanian, S., Cheng, C., Harmanci, A., Lochovsky, L., Min, R., Mu, X. J., Rozowsky, J., Yan, K. K., Yip, K. Y., and Birney, E. (Sep, 2012) An integrated encyclopedia of DNA elements in the human genome. *Nature*, **489**(7414), 57–74.
- [3] Sloan, C. A., Chan, E. T., Davidson, J. M., Malladi, V. S., Strattan, J. S., Hitz, B. C., Gabdank, I., Narayanan, A. K., Ho, M., Lee, B. T., Rowe, L. D., Dreszer, T. R., Roe, G., Podduturi, N. R., Tanaka, F., Hong, E. L., and Cherry, J. M. (Jan, 2016) ENCODE data at the ENCODE portal. *Nucleic Acids Res.*, **44**(D1), D726–732.
- [4] Eden, E., Navon, R., Steinfeld, I., Lipson, D., and Yakhini, Z. (Feb, 2009) GOrilla: a tool for discovery and visualization of enriched GO terms in ranked gene lists. *BMC Bioinformatics*, **10**, 48.
